# Supplementary material for: Multiplex real-time PCR assay to detect illegal trade of CITES-listed shark species
Source: PubMed Central journal article supplement (PMC6218538; doi:10.1038/s41598-018-34663-6), 2018-11-05

# Multiplex real-time PCR assay to detect illegal trade of CITES-listed shark species

Diego Cardeñoso<sup>1,2\*</sup>, Jessica Quinlan<sup>3</sup>, Kwok Ho Shea<sup>4</sup>, Demian D. Chapman<sup>3</sup>

<sup>1</sup> School of Marine and Atmospheric Science, Stony Brook University, Stony Brook, New York, 11794, United States of America

<sup>2</sup> Fundación Colombia Azul, Bogotá, Colombia

<sup>3</sup> Department of Biological Sciences, Florida International University, 3000 NE 151<sup>st</sup> Street, North Miami, Florida, 33181, United States of America

<sup>4</sup> BLOOM Association, Central, Hong Kong.

\*Corresponding Author: Diego Cardeñoso

Email: diego.cardeosa@stonybrook.edu

Supplementary Figure S1. Thermal cycling profile for the multiplex rt-PCR indicating the different stages, times, and temperatures. Camera icons represent the stages where the QuantStudio 5 system collects the data.

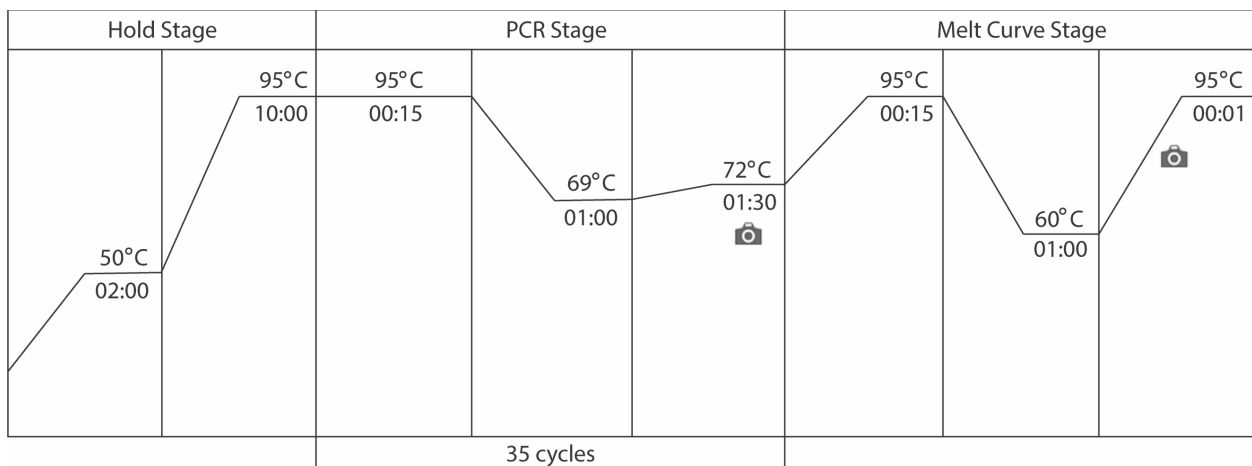

Supplement: 41598_2018_34663_MOESM1_ESM.pdf [file 41598_2018_34663_MOESM1_ESM.pdf]
